# Supplementary material for: AUSPEX: a graphical tool for X-ray diffraction data analysis
Source: PubMed Central journal article supplement (PMC5586246; doi:10.1107/s205979831700969x), 2017-08-08
Supplement: d-73-00729-sup1.pdf [file d-73-00729-sup1.pdf]

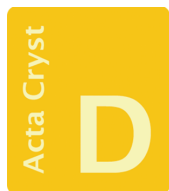

STRUCTURAL  
BIOLOGY

**Volume 73 (2017)**

**Supporting information for article:**

***AUSPEX*: a graphical tool for X-ray diffraction data analysis**

**Andrea Thorn, James Parkhurst, Paul Emsley, Robert A. Nicholls, Melanie Vollmar, Gwyndaf Evans and Garib N. Murshudov**

**Test set A – Preliminary Study**

156 data sets from the JCSG, collected on pixel detectors; evaluated were plots of  $F_{obs}$  vs. resolution. “Data were omitted at ice ring resolutions” refers to the deposited data set in the PDB missing resolution shells of X-ray data.

| <b>PDB</b> | <b>remarks</b>    |
|------------|-------------------|
| 3R4K       |                   |
| 3RH7       |                   |
| 3SNK       |                   |
| 4DAD       |                   |
| 4DGU       |                   |
| 4DJN       |                   |
| 4DN6       | ice rings visible |
| 4DWE       |                   |
| 4E0E       |                   |
| 4E2E       | ice rings visible |
| 4E5V       |                   |
| 4E6E       |                   |
| 4E6F       |                   |
| 4E72       |                   |
| 4E9K       |                   |
| 4EBG       |                   |
| 4ECF       |                   |
| 4ECN       |                   |
| 4ECO       |                   |
| 4EF1       | ice rings visible |
| 4EF2       |                   |
| 4EI0       |                   |
| 4EPS       |                   |
| 4EPZ       | ice rings visible |
| 4EXR       |                   |
| 4EZG       | ice rings visible |
| 4F53       |                   |
| 4FD0       |                   |
| 4FDW       |                   |
| 4FDY       |                   |
| 4FJ6       |                   |

|      |                   |
|------|-------------------|
| 4FMR | ice rings visible |
| 4FMZ |                   |
| 4FSS |                   |
| 4FTD |                   |
| 4G2A |                   |
| 4G5A |                   |
| 4GBS |                   |
| 4GHB |                   |
| 4GHN |                   |
| 4GL3 |                   |
| 4GOQ |                   |
| 4GOT | ice rings visible |
| 4GT6 |                   |
| 4H08 |                   |
| 4H1X | ice rings visible |
| 4H3W | ice rings visible |
| 4H40 |                   |
| 4H4J |                   |
| 4H87 |                   |
| 4HBS |                   |
| 4HF7 | ice rings visible |
| 4HPE |                   |
| 4HXC | ice rings visible |
| 4HYZ |                   |
| 4I95 |                   |
| 4IEJ | ice rings visible |
| 4JHY |                   |
| 4JM1 |                   |
| 4JON |                   |
| 4JPQ |                   |
| 4JQS |                   |
| 4JRL |                   |
| 4JX0 |                   |
| 4JX2 |                   |
| 4K3F |                   |

|      |                                      |
|------|--------------------------------------|
| 4K4K |                                      |
| 4K61 |                                      |
| 4KH8 |                                      |
| 4KH9 |                                      |
| 4KQ7 |                                      |
| 4KQT |                                      |
| 4KW2 | ice rings visible                    |
| 4KWY |                                      |
| 4L1N |                                      |
| 4L3R |                                      |
| 4L8J |                                      |
| 4L8N |                                      |
| 4LB8 |                                      |
| 4LBA |                                      |
| 4LER |                                      |
| 4LG3 |                                      |
| 4LGQ |                                      |
| 4LII |                                      |
| 4LJX |                                      |
| 4LQX |                                      |
| 4LQZ |                                      |
| 4LR4 |                                      |
| 4M0H |                                      |
| 4M8K |                                      |
| 4M8R |                                      |
| 4MDW |                                      |
| 4ME9 |                                      |
| 4MJF |                                      |
| 4MJG | data omitted at ice ring resolutions |
| 4MRU |                                      |
| 4MU9 |                                      |
| 4MUD |                                      |
| 4MXN |                                      |
| 4MXT |                                      |
| 4MYR |                                      |

|      |                                      |
|------|--------------------------------------|
| 4N0P |                                      |
| 4N0R |                                      |
| 4NKP |                                      |
| 4NRD |                                      |
| 4NW4 |                                      |
| 4O2T |                                      |
| 4OBI |                                      |
| 4OBM |                                      |
| 4OLE |                                      |
| 4ONZ |                                      |
| 4OO3 |                                      |
| 4OPM | ice rings visible                    |
| 4OPW |                                      |
| 4ORL |                                      |
| 4OTE |                                      |
| 4OUQ |                                      |
| 4POI | ice rings visible                    |
| 4PQX |                                      |
| 4PS6 | ice rings visible                    |
| 4PUC | data omitted at ice ring resolutions |
| 4PUX |                                      |
| 4PW1 |                                      |
| 4PXY |                                      |
| 4Q0Y |                                      |
| 4Q1Z |                                      |
| 4Q20 |                                      |
| 4Q34 |                                      |
| 4Q53 |                                      |
| 4Q98 |                                      |
| 4Q9A |                                      |
| 4QAN |                                      |
| 4QDY |                                      |
| 4QEY |                                      |
| 4QFU |                                      |
| 4QHZ |                                      |

|      |  |
|------|--|
| 4QJR |  |
| 4QOA |  |
| 4QPV |  |
| 4QRJ |  |
| 4QRL |  |
| 4QU6 |  |
| 4QU7 |  |
| 4QVU |  |
| 4R0K |  |
| 4R1K |  |
| 4R4G |  |
| 4R5O |  |
| 4R7F |  |
| 4R8O |  |
| 4RAA |  |
| 4RBO |  |
| 4RWV |  |
| 4YGT |  |
| 4YGU |  |
| 4YOD |  |

**Test set B – Frequency of Ice Rings**

200 data sets for which intensities were deposited, selected at random from the PDB. Visually inspected and evaluated were plots of  $I_{obs}$  vs. resolution. “Data were omitted” refers to the deposited data set in the PDB missing resolution shells of X-ray data.

| <b>PDB</b> | <b>remarks</b>                                                | <b>collection year</b> |
|------------|---------------------------------------------------------------|------------------------|
| 425D       |                                                               | 1995                   |
| 1O1I       |                                                               | 1998                   |
| 1EBV       |                                                               | 1999                   |
| 1R5G       |                                                               | 1999                   |
| 1HJB       |                                                               | 2000                   |
| 3ZOW       |                                                               | 2001                   |
| 4DP0       |                                                               | 2002                   |
| 1SDV       | data were omitted; additional ice rings visible               | 2002                   |
| 1NRJ       | ice rings visible and shifted from the usual resolution range | 2002                   |
| 3FEI       |                                                               | 2002                   |
| 1O00       |                                                               | 2002                   |
| 3G8I       |                                                               | 2002                   |
| 1U00       |                                                               | 2002                   |
| 2FVD       |                                                               | 2002                   |
| 4LA0       |                                                               | 2003                   |
| 1PW4       |                                                               | 2003                   |
| 1O1Y       |                                                               | 2003                   |
| 1SCZ       |                                                               | 2003                   |
| 1V98       |                                                               | 2003                   |
| 1YLT       |                                                               | 2004                   |
| 3DKX       |                                                               | 2004                   |
| 4GLD       |                                                               | 2004                   |
| 1YKZ       |                                                               | 2004                   |
| 2ATP       |                                                               | 2004                   |
| 2W1Y       |                                                               | 2004                   |
| 2EHW       |                                                               | 2004                   |
| 2AFU       | ice rings visible                                             | 2004                   |
| 2NUE       |                                                               | 2005                   |
| 2ATK       |                                                               | 2005                   |
| 2EG3       |                                                               | 2005                   |
| 3OQ1       |                                                               | 2005                   |
| 2HRH       |                                                               | 2005                   |
| 2BDQ       | ice rings visible                                             | 2005                   |
| 2IEW       | ice rings visible                                             | 2005                   |
| 2IZP       | data were omitted; additional ice rings visible               | 2005                   |
| 2OUQ       |                                                               | 2006                   |
| 2I1Y       | ice rings visible                                             | 2006                   |
| 2QES       |                                                               | 2006                   |
| 2DW7       |                                                               | 2006                   |
| 2EJ1       |                                                               | 2006                   |
| 2I5A       |                                                               | 2006                   |

|             |                                                               |      |
|-------------|---------------------------------------------------------------|------|
| <i>3GJW</i> | ice rings visible                                             | 2006 |
| <i>2O1E</i> |                                                               | 2006 |
| <i>2E1U</i> |                                                               | 2006 |
| <i>3C19</i> | data were omitted                                             | 2006 |
| <i>2PT5</i> | ice rings visible                                             | 2006 |
| <i>3ECN</i> |                                                               | 2007 |
| <i>3B2R</i> | ice rings visible                                             | 2007 |
| <i>2PP3</i> |                                                               | 2007 |
| <i>2Z5L</i> |                                                               | 2007 |
| <i>3NOQ</i> |                                                               | 2007 |
| <i>3EE6</i> |                                                               | 2007 |
| <i>3ZW3</i> |                                                               | 2007 |
| <i>4GPG</i> |                                                               | 2007 |
| <i>3FID</i> | ice rings visible                                             | 2007 |
| <i>3BF8</i> | ice rings visible                                             | 2007 |
| <i>3VFE</i> |                                                               | 2007 |
| <i>2RAQ</i> |                                                               | 2007 |
| <i>2R1V</i> | data were omitted; additional ice rings visible               | 2007 |
| <i>4QXM</i> |                                                               | 2007 |
| <i>2WY1</i> |                                                               | 2007 |
| <i>2Y33</i> |                                                               | 2008 |
| <i>3VT8</i> |                                                               | 2008 |
| <i>3LY7</i> | ice rings visible                                             | 2008 |
| <i>3GHE</i> |                                                               | 2008 |
| <i>3QWX</i> | ice rings visible                                             | 2008 |
| <i>3KLJ</i> |                                                               | 2008 |
| <i>2WIW</i> |                                                               | 2008 |
| <i>3GGF</i> |                                                               | 2009 |
| <i>3N2O</i> | ice rings visible                                             | 2009 |
| <i>4DQG</i> |                                                               | 2009 |
| <i>3TUA</i> |                                                               | 2009 |
| <i>3U2H</i> |                                                               | 2009 |
| <i>3W6I</i> |                                                               | 2009 |
| <i>2XBJ</i> |                                                               | 2009 |
| <i>3QME</i> |                                                               | 2009 |
| <i>4I9U</i> |                                                               | 2009 |
| <i>3ARF</i> |                                                               | 2009 |
| <i>4G94</i> |                                                               | 2009 |
| <i>4Z8S</i> |                                                               | 2009 |
| <i>4G4Z</i> |                                                               | 2009 |
| <i>4U10</i> |                                                               | 2009 |
| <i>3AJH</i> |                                                               | 2009 |
| <i>3MTL</i> | ice rings visible and shifted from the usual resolution range | 2009 |
| <i>3OYZ</i> | ice rings visible                                             | 2009 |
| <i>3P12</i> |                                                               | 2010 |
| <i>3TN0</i> |                                                               | 2010 |
| <i>2XWJ</i> |                                                               | 2010 |
| <i>4LCG</i> | ice rings visible                                             | 2010 |



|             |                                                               |      |
|-------------|---------------------------------------------------------------|------|
| <i>4BJZ</i> |                                                               | 2010 |
| <i>4DGC</i> |                                                               | 2010 |
| <i>5IVI</i> | ice rings visible                                             | 2010 |
| <i>2XWR</i> |                                                               | 2010 |
| <i>3V6Y</i> | ice rings visible                                             | 2010 |
| <i>4QPD</i> | ice rings visible                                             | 2010 |
| <i>4ED3</i> |                                                               | 2010 |
| <i>4ZMK</i> |                                                               | 2010 |
| <i>3TRU</i> |                                                               | 2010 |
| <i>5L5N</i> |                                                               | 2010 |
| <i>2YID</i> |                                                               | 2010 |
| <i>2Y6R</i> | ice rings visible                                             | 2010 |
| <i>4H9A</i> |                                                               | 2011 |
| <i>4BQU</i> |                                                               | 2011 |
| <i>5KAT</i> |                                                               | 2011 |
| <i>3U3B</i> |                                                               | 2011 |
| <i>4U2L</i> |                                                               | 2011 |
| <i>5KJE</i> |                                                               | 2011 |
| <i>4DZG</i> |                                                               | 2011 |
| <i>3T6O</i> |                                                               | 2011 |
| <i>4P59</i> |                                                               | 2011 |
| <i>3VY5</i> |                                                               | 2011 |
| <i>4RQ9</i> |                                                               | 2011 |
| <i>5LGW</i> | ice rings visible                                             | 2011 |
| <i>4WNV</i> | ice rings visible                                             | 2011 |
| <i>4F3Q</i> | ice rings visible                                             | 2011 |
| <i>4KNJ</i> |                                                               | 2011 |
| <i>4H1E</i> |                                                               | 2011 |
| <i>4REP</i> |                                                               | 2011 |
| <i>4JH3</i> |                                                               | 2011 |
| <i>4G81</i> |                                                               | 2012 |
| <i>4UC9</i> |                                                               | 2012 |
| <i>4WP5</i> |                                                               | 2012 |
| <i>4HKA</i> |                                                               | 2012 |
| <i>4JFT</i> |                                                               | 2012 |
| <i>3WN2</i> | ice rings visible and shifted from the usual resolution range | 2012 |
| <i>4MZE</i> |                                                               | 2012 |
| <i>4HG2</i> |                                                               | 2012 |
| <i>3WSZ</i> |                                                               | 2012 |
| <i>4IU4</i> |                                                               | 2012 |
| <i>3WBN</i> |                                                               | 2012 |
| <i>4Y7N</i> | ice rings visible                                             | 2012 |
| <i>4KVR</i> |                                                               | 2012 |
| <i>3ZIY</i> |                                                               | 2012 |
| <i>4RRZ</i> |                                                               | 2012 |
| <i>4UWQ</i> |                                                               | 2012 |
| <i>3WBB</i> |                                                               | 2012 |
| <i>4OCF</i> | ice rings visible                                             | 2012 |

|             |                                                               |      |
|-------------|---------------------------------------------------------------|------|
| <i>4PRH</i> |                                                               | 2012 |
| <i>4KA8</i> | ice rings visible                                             | 2012 |
| <i>4CXO</i> |                                                               | 2012 |
| <i>4IP1</i> |                                                               | 2012 |
| <i>4IO7</i> |                                                               | 2012 |
| <i>4L2Z</i> |                                                               | 2012 |
| <i>4P12</i> |                                                               | 2012 |
| <i>4PJO</i> |                                                               | 2013 |
| <i>4JD7</i> | ice rings visible                                             | 2013 |
| <i>5EPN</i> |                                                               | 2013 |
| <i>4M9E</i> |                                                               | 2013 |
| <i>4KDS</i> | ice rings visible                                             | 2013 |
| <i>4CVZ</i> |                                                               | 2013 |
| <i>4CVZ</i> |                                                               | 2013 |
| <i>4C9N</i> | ice rings visible                                             | 2013 |
| <i>5CR0</i> |                                                               | 2013 |
| <i>4N6P</i> |                                                               | 2013 |
| <i>4QQL</i> | ice rings visible                                             | 2013 |
| <i>4NEQ</i> |                                                               | 2013 |
| <i>5CPK</i> |                                                               | 2013 |
| <i>4NJ4</i> |                                                               | 2013 |
| <i>4NS1</i> |                                                               | 2013 |
| <i>4RLT</i> |                                                               | 2013 |
| <i>4R1B</i> | ice rings visible                                             | 2013 |
| <i>4XA1</i> |                                                               | 2013 |
| <i>4CVO</i> |                                                               | 2014 |
| <i>4P3V</i> |                                                               | 2014 |
| <i>4Q8S</i> |                                                               | 2014 |
| <i>5BQB</i> |                                                               | 2014 |
| <i>5BND</i> | ice rings visible                                             | 2014 |
| <i>4ZHG</i> |                                                               | 2014 |
| <i>5AWF</i> |                                                               | 2014 |
| <i>4RZH</i> |                                                               | 2014 |
| <i>4Z90</i> |                                                               | 2014 |
| <i>5CL0</i> |                                                               | 2014 |
| <i>4X62</i> | ice rings visible                                             | 2014 |
| <i>4WN2</i> |                                                               | 2014 |
| <i>5ABN</i> |                                                               | 2014 |
| <i>5DH6</i> |                                                               | 2014 |
| <i>4XH6</i> |                                                               | 2014 |
| <i>5EK4</i> | ice rings visible and shifted from the usual resolution range | 2014 |
| <i>4Y88</i> |                                                               | 2014 |
| <i>5IW8</i> |                                                               | 2015 |
| <i>5I3Y</i> | ice rings visible                                             | 2015 |
| <i>5F13</i> |                                                               | 2015 |
| <i>4HS2</i> |                                                               | 2011 |
| <i>1RQN</i> |                                                               | N/A  |
| <i>2CJR</i> |                                                               | N/A  |

|             |                                                               |     |
|-------------|---------------------------------------------------------------|-----|
| <i>2PHF</i> |                                                               | N/A |
| <i>2XJJ</i> |                                                               | N/A |
| <i>3EUZ</i> |                                                               | N/A |
| <i>3ZP8</i> |                                                               | N/A |
| <i>4BWG</i> |                                                               | N/A |
| <i>4CVL</i> |                                                               | N/A |
| <i>4DO1</i> | ice rings visible                                             | N/A |
| <i>4E85</i> |                                                               | N/A |
| <i>4GR2</i> |                                                               | N/A |
| <i>4QTF</i> | ice rings visible                                             | N/A |
| <i>4UWS</i> |                                                               | N/A |
| <i>5A30</i> | ice rings visible and shifted from the usual resolution range | N/A |
| <i>5ACV</i> | ice rings visible                                             | N/A |
| <i>4IOM</i> | ice rings visible                                             | N/A |
| <i>4OW9</i> |                                                               | N/A |

**Test set C – Automatic Detection of Ice Rings**

200 data sets for which intensities were deposited, selected at random from the PDB. Visually inspected were plots of  $I_{obs}$  vs. resolution. “Data omitted” refers to the deposited data set in the PDB missing resolution shells of X-ray data.

| <b>PDB</b> | <b>Visual</b> | <b>phenix.xtriage</b> | <b>Ctruncate</b> | <b>Auspex</b> | <b>collection year</b> | <b>remarks</b> |
|------------|---------------|-----------------------|------------------|---------------|------------------------|----------------|
| 1RDR       | negative      | negative              | negative         | negative      | 1995                   |                |
| 1C6H       | negative      | positive              | positive         | negative      | 1995                   |                |
| 1DCR       | negative      | negative              | positive         | positive      | 1996                   |                |
| 1EQM       | negative      | negative              | negative         | negative      | 1998                   |                |
| 1R0Q       | negative      | negative              | positive         | negative      | 1998                   |                |
| 1O1P       | negative      | negative              | negative         | negative      | 1999                   |                |
| 1JG1       | negative      | negative              | positive         | negative      | 2000                   |                |
| 1SJB       | negative      | negative              | negative         | positive      | 2001                   |                |
| 1VAT       | negative      | negative              | positive         | negative      | 2001                   |                |
| 1K34       | negative      | negative              | positive         | negative      | 2001                   |                |
| 2XYB       | negative      | negative              | negative         | negative      | 2001                   |                |
| 2GN9       | negative      | negative              | negative         | negative      | 2002                   |                |
| 1N6L       | negative      | negative              | positive         | negative      | 2002                   |                |
| 1YM0       | positive      | negative              | negative         | negative      | 2002                   |                |
| 2AVQ       | negative      | negative              | positive         | negative      | 2002                   |                |
| 2BSM       | negative      | positive              | negative         | positive      | 2003                   |                |
| 2H9Y       | negative      | negative              | negative         | negative      | 2003                   |                |
| 1ZZO       | negative      | negative              | positive         | negative      | 2003                   |                |
| 2FBD       | negative      | positive              | positive         | negative      | 2003                   |                |
| 3N2U       | positive      | negative              | positive         | negative      | 2003                   |                |
| 1YI1       | negative      | negative              | negative         | negative      | 2003                   |                |
| 2FG4       | negative      | negative              | positive         | negative      | 2003                   |                |
| 1YUM       | positive      | negative              | positive         | positive      | 2004                   |                |
| 1YG9       | negative      | negative              | negative         | negative      | 2004                   |                |
| 1ZIQ       | positive      | negative              | positive         | positive      | 2004                   |                |
| 1W96       | negative      | negative              | negative         | negative      | 2004                   |                |
| 3FK3       | negative      | negative              | positive         | negative      | 2004                   |                |
| 1VQ8       | positive      | negative              | negative         | positive      | 2004                   |                |
| 2B15       | negative      | negative              | positive         | negative      | 2004                   |                |
| 2I2Z       | negative      | negative              | negative         | negative      | 2004                   |                |
| 1XEA       | positive      | positive              | negative         | negative      | 2004                   |                |
| 2WKN       | negative      | negative              | positive         | negative      | 2004                   |                |
| 1Z6L       | positive      | negative              | positive         | negative      | 2004                   |                |
| 2W5P       | negative      | negative              | positive         | negative      | 2004                   |                |
| 2FI4       | negative      | negative              | negative         | negative      | 2005                   |                |
| 2ZU2       | negative      | negative              | negative         | negative      | 2005                   |                |
| 2O6M       | negative      | negative              | negative         | negative      | 2005                   |                |
| 3BT0       | negative      | negative              | positive         | negative      | 2005                   |                |
| 2QEX       | negative      | negative              | negative         | negative      | 2005                   |                |
| 2HD6       | negative      | negative              | negative         | negative      | 2005                   |                |
| 2NPZ       | negative      | negative              | negative         | positive      | 2005                   |                |

|      |          |          |          |          |      |                                      |
|------|----------|----------|----------|----------|------|--------------------------------------|
| 2D5N | negative | negative | negative | negative | 2005 |                                      |
| 3P88 | negative | negative | positive | negative | 2005 |                                      |
| 2EW0 | negative | negative | positive | negative | 2005 |                                      |
| 2GP9 | negative | negative | positive | negative | 2005 |                                      |
| 2GB9 | negative | negative | positive | negative | 2005 |                                      |
| 2RCU | negative | positive | positive | negative | 2005 | data omitted                         |
| 3VHR | negative | negative | negative | negative | 2005 |                                      |
| 2PI5 | negative | negative | negative | negative | 2005 |                                      |
| 2Z6A | negative | negative | negative | negative | 2005 |                                      |
| 3I9U | negative | positive | positive | negative | 2006 |                                      |
| 2G6Q | negative | negative | positive | negative | 2006 |                                      |
| 3BBM | negative | negative | negative | negative | 2006 |                                      |
| 3VHC | negative | negative | positive | negative | 2006 |                                      |
| 4KRD | negative | negative | positive | negative | 2006 |                                      |
| 3EHB | positive | negative | positive | positive | 2006 |                                      |
| 4PMN | negative | negative | negative | negative | 2006 |                                      |
| 2PNX | negative | negative | positive | negative | 2007 |                                      |
| 2VW9 | positive | positive | positive | negative | 2007 | data omitted                         |
| 5FDQ | negative | positive | negative | negative | 2007 |                                      |
| 3DRE | negative | negative | positive | negative | 2007 |                                      |
| 2ZKS | positive | negative | negative | negative | 2008 | ice rings shifted                    |
| 3IFU | negative | negative | negative | negative | 2008 | ring outside ice ring<br>resolutions |
| 3A65 | negative | negative | negative | negative | 2008 |                                      |
| 3DET | negative | negative | negative | negative | 2008 |                                      |
| 3TOG | negative | negative | positive | positive | 2008 |                                      |
| 3GL9 | negative | positive | positive | negative | 2008 |                                      |
| 2XTE | negative | negative | negative | negative | 2008 |                                      |
| 4EX6 | negative | negative | positive | negative | 2008 |                                      |
| 3M9S | negative | negative | negative | negative | 2008 |                                      |
| 3N04 | negative | negative | positive | negative | 2008 |                                      |
| 4DW4 | positive | positive | positive | positive | 2008 |                                      |
| 5D1P | negative | negative | negative | negative | 2009 |                                      |
| 3RL5 | negative | negative | positive | negative | 2009 |                                      |
| 3HGY | negative | positive | negative | negative | 2009 |                                      |
| 2X13 | negative | negative | negative | negative | 2009 |                                      |
| 5CDT | negative | negative | negative | negative | 2009 |                                      |
| 3HNM | positive | negative | negative | negative | 2009 |                                      |
| 4NT2 | negative | negative | positive | negative | 2009 |                                      |
| 3JQY | positive | positive | positive | positive | 2009 |                                      |
| 3RMO | negative | negative | positive | positive | 2009 |                                      |
| 5FN8 | negative | negative | negative | negative | 2009 |                                      |
| 3T8V | negative | negative | negative | negative | 2009 |                                      |
| 3NCG | positive | positive | positive | positive | 2009 | data omitted                         |
| 3NHW | negative | negative | negative | negative | 2009 |                                      |
| 3MNL | negative | negative | negative | negative | 2009 |                                      |
| 4F27 | positive | positive | positive | positive | 2009 |                                      |
| 4L17 | negative | negative | negative | negative | 2009 |                                      |

|      |          |          |          |          |      |              |
|------|----------|----------|----------|----------|------|--------------|
| 4EA7 | negative | negative | positive | positive | 2009 |              |
| 3B1J | negative | negative | negative | negative | 2009 |              |
| 3LZ0 | positive | negative | negative | positive | 2009 |              |
| 4AC2 | positive | negative | positive | negative | 2009 |              |
| 3X42 | negative | negative | positive | negative | 2010 |              |
| 4NZG | positive | positive | positive | positive | 2010 |              |
| 3MYT | positive | positive | positive | positive | 2010 | data omitted |
| 3OSZ | negative | negative | negative | negative | 2010 |              |
| 3MT0 | negative | negative | positive | negative | 2010 |              |
| 2XWA | negative | negative | negative | negative | 2010 |              |
| 4HA4 | negative | negative | positive | negative | 2010 |              |
| 3Q3O | negative | positive | positive | negative | 2010 |              |
| 3NVS | positive | negative | negative | positive | 2010 |              |
| 4H5B | negative | negative | positive | negative | 2010 |              |
| 3O2N | negative | negative | positive | negative | 2010 |              |
| 4A14 | negative | positive | positive | negative | 2010 |              |
| 5KC5 | negative | negative | negative | negative | 2010 |              |
| 4F5J | negative | negative | negative | negative | 2010 |              |
| 4GFA | negative | negative | negative | negative | 2010 |              |
| 3PO9 | negative | negative | negative | negative | 2010 |              |
| 4ELP | negative | negative | negative | negative | 2010 |              |
| 3TAL | negative | negative | negative | negative | 2010 |              |
| 3ZYM | positive | negative | negative | negative | 2010 |              |
| 3US1 | negative | negative | negative | negative | 2010 |              |
| 4NXN | negative | negative | negative | positive | 2010 |              |
| 3SBI | negative | negative | positive | negative | 2010 |              |
| 3SYA | negative | negative | negative | negative | 2010 |              |
| 4GBA | positive | negative | negative | positive | 2011 |              |
| 3R3M | negative | negative | negative | negative | 2011 |              |
| 4E2W | negative | negative | positive | positive | 2011 |              |
| 3RIB | negative | negative | negative | negative | 2011 |              |
| 4BI2 | negative | negative | negative | negative | 2011 |              |
| 3SV9 | negative | negative | negative | negative | 2011 |              |
| 3SUF | negative | negative | negative | negative | 2011 |              |
| 4MCF | negative | negative | negative | negative | 2011 |              |
| 4MW7 | negative | negative | negative | negative | 2011 |              |
| 4JC7 | negative | negative | negative | negative | 2011 |              |
| 4MIY | negative | negative | negative | negative | 2011 |              |
| 4X7K | negative | negative | negative | negative | 2011 |              |
| 4ES4 | negative | negative | negative | negative | 2011 |              |
| 4K37 | positive | negative | negative | negative | 2011 |              |
| 3U12 | negative | negative | positive | negative | 2011 |              |
| 4AFD | negative | negative | positive | negative | 2011 |              |
| 4M1O | negative | negative | negative | negative | 2011 |              |
| 4TVQ | positive | negative | negative | negative | 2011 |              |
| 4MB7 | negative | negative | negative | negative | 2011 |              |
| 5C1X | negative | negative | negative | negative | 2012 |              |
| 4LO3 | negative | positive | negative | negative | 2012 |              |

|      |          |          |          |          |      |              |
|------|----------|----------|----------|----------|------|--------------|
| 4HKX | negative | negative | positive | positive | 2012 |              |
| 3WE4 | negative | negative | negative | negative | 2012 |              |
| 4WIE | positive | positive | negative | negative | 2012 |              |
| 4IAZ | negative | negative | negative | negative | 2012 |              |
| 3WF7 | negative | negative | negative | negative | 2012 |              |
| 4KGR | negative | negative | negative | positive | 2012 |              |
| 4ISZ | negative | negative | negative | negative | 2012 |              |
| 4IPG | negative | negative | positive | negative | 2012 |              |
| 4LA6 | negative | negative | negative | negative | 2012 |              |
| 4LY8 | positive | negative | negative | positive | 2012 |              |
| 4J7Y | positive | positive | negative | positive | 2012 |              |
| 4IKM | negative | negative | positive | negative | 2012 |              |
| 4HJX | negative | negative | negative | negative | 2012 |              |
| 3W7V | negative | negative | positive | positive | 2012 |              |
| 4Q75 | positive | negative | positive | negative | 2012 |              |
| 4MVS | negative | negative | negative | negative | 2012 |              |
| 4J29 | negative | negative | positive | negative | 2012 |              |
| 4X6B | positive | negative | negative | positive | 2012 |              |
| 4OU1 | positive | negative | positive | positive | 2013 |              |
| 4L55 | negative | negative | negative | negative | 2013 |              |
| 4NZ0 | negative | negative | positive | negative | 2013 |              |
| 4CCM | positive | negative | negative | negative | 2013 |              |
| 4OQ4 | negative | negative | positive | negative | 2013 |              |
| 4YCU | positive | negative | negative | positive | 2013 |              |
| 4M00 | positive | positive | positive | positive | 2013 |              |
| 4Q3O | positive | negative | negative | positive | 2013 |              |
| 4XET | negative | negative | positive | negative | 2013 |              |
| 4P66 | negative | negative | negative | negative | 2013 |              |
| 4X8W | negative | positive | positive | negative | 2013 |              |
| 4NSV | negative | negative | positive | negative | 2013 |              |
| 4MH4 | negative | negative | positive | negative | 2013 |              |
| 4YYA | negative | negative | negative | negative | 2013 |              |
| 4WV8 | negative | negative | negative | negative | 2013 |              |
| 4YW6 | positive | negative | positive | positive | 2013 | data omitted |
| 4O75 | negative | negative | positive | negative | 2013 |              |
| 4QYM | negative | negative | positive | negative | 2013 |              |
| 4CRH | negative | negative | positive | negative | 2014 |              |
| 4XF9 | negative | negative | positive | negative | 2014 |              |
| 5A7S | negative | negative | positive | positive | 2014 |              |
| 5FJS | negative | negative | negative | negative | 2014 |              |
| 5CES | negative | negative | positive | negative | 2014 |              |
| 5HF6 | negative | negative | negative | negative | 2014 |              |
| 4RYL | positive | positive | positive | positive | 2014 |              |
| 5D0C | positive | positive | positive | negative | 2014 | data omitted |
| 4ZVN | negative | negative | negative | negative | 2014 |              |
| 5ELF | negative | negative | negative | negative | 2014 |              |
| 4Z3M | negative | negative | negative | negative | 2014 |              |
| 5C8X | negative | negative | positive | negative | 2015 |              |

|      |          |          |          |          |      |              |
|------|----------|----------|----------|----------|------|--------------|
| 5E5T | negative | negative | positive | negative | 2015 |              |
| 5FAQ | positive | negative | positive | positive | 2015 |              |
| 1I0V | negative | negative | positive | negative | N/A  |              |
| 2XDS | negative | negative | positive | negative | N/A  |              |
| 3AP3 | negative | negative | negative | negative | N/A  |              |
| 3FD5 | negative | positive | positive | negative | N/A  |              |
| 3IKT | positive | negative | negative | positive | N/A  |              |
| 3ZXH | positive | negative | positive | positive | N/A  |              |
| 3ZZS | negative | negative | positive | positive | N/A  |              |
| 4AW9 | positive | positive | positive | negative | N/A  | data omitted |
| 4AWA | negative | negative | negative | negative | N/A  |              |
| 4G1N | negative | negative | negative | negative | N/A  |              |
| 4KWC | negative | negative | positive | negative | N/A  |              |
| 4N9R | positive | negative | positive | negative | N/A  |              |
| 4OQ5 | negative | negative | negative | negative | N/A  |              |
| 4UT0 | negative | negative | negative | negative | N/A  |              |
